# Supplementary material for: QSAR, structure-based pharmacophore modelling and biological evaluation of novel platelet ADP receptor (P2Y12) antagonist
Source: Royal Society of Chemistry journal article supplement (doi:10.1039/d2md00285j), 2022-11-22
Supplement: d2md00285j1.pdf [file d2md00285j1.pdf]

S U P P L E M E N T A R Y   M A T E R I A L S

---

## QSAR, Structure-Based Pharmacophore Modelling and Biological Evaluation of Novel Platelet ADP Receptor (P2Y<sub>12</sub>) Antagonist

Belal O. Al-Najjar<sup>a,b,\*</sup>, Manal A. Abbas<sup>b,c</sup>, Obada A. Sibai<sup>a,b</sup>, Fadi G. Saqallah<sup>d</sup> and Aya Y. Al-Kabariti<sup>e,f</sup>

<sup>a</sup> Department of Pharmaceutical Sciences, Faculty of Pharmacy, Al-Ahliyya Amman University, 19328 Amman, Jordan.

<sup>b</sup> Pharmacological and Diagnostic Research Centre, Al-Ahliyya Amman University, 19328 Amman, Jordan.

<sup>c</sup> Department of Medical Laboratory Sciences, Faculty of Allied Medical Sciences, Al-Ahliyya Amman University, 19328 Amman, Jordan.

<sup>d</sup> Discipline of Pharmaceutical Chemistry, School of Pharmaceutical Sciences, Universiti Sains Malaysia, 11800 Penang, Malaysia.

<sup>e</sup> Department of Biopharmaceutics and Clinical Pharmacy, Faculty of Pharmacy, Al-Ahliyya Amman University, 19328 Amman, Jordan.

<sup>f</sup> Institute of Cancer Therapeutics, Faculty of Life Sciences, University of Bradford, BD7 1DP Bradford, United Kingdom.

\* **Corresponding author:** Belal O. Al-Najjar, Department of Pharmaceutical Sciences, Faculty of Pharmacy, Al-Ahliyya Amman University, 19328 Amman, Jordan; +962-5-350-0211(ext. 2053); [b.najjar@ammanu.edu.jo](mailto:b.najjar@ammanu.edu.jo), [najjar.belal@gmail.com](mailto:najjar.belal@gmail.com)

---

### CONTENTS

|                                                                                                                                                                                            | <b>Page</b> |
|--------------------------------------------------------------------------------------------------------------------------------------------------------------------------------------------|-------------|
| <b>Table S1.</b> Pharmacophore models generated by Receptor-ligand pharmacophore generation protocol embedded in Discovery Studio. ....                                                    | 2           |
| <b>Fig. S1.</b> Histograms representing the Area under the curve from the platelet aggregation test for <b>(a)</b> NSC380323, <b>(b)</b> NSC617595 and <b>(c)</b> NSC618159 with ADP. .... | 4           |

**Table S1.** Pharmacophore models generated by Receptor-ligand pharmacophore generation protocol embedded in Discovery Studio.

| #  | Pharmacophore Model | Maximum Features | Minimum I.D. <sup>a</sup> | Maximum E.V.D. <sup>b</sup> | ROC <sup>c</sup> – AUC <sup>d</sup> | Sensitivity | Specificity |
|----|---------------------|------------------|---------------------------|-----------------------------|-------------------------------------|-------------|-------------|
| 1  | T1D1P1              | 6                | 1                         | 5                           | 0.831                               | 1           | 0.63889     |
| 2  | T1D1P2              |                  |                           |                             | 0.726                               | 0.98901     | 0.38889     |
| 3  | T1D1P3              |                  |                           |                             | 0.894                               | 1           | 0.5         |
| 4  | T1D1P4              |                  |                           |                             | 0.702                               | 0.98901     | 0.38889     |
| 5  | T1D1P5              |                  |                           |                             | 0.828                               | 1           | 0.5         |
| 6  | T1D1P6              |                  |                           |                             | 0.637                               | 1           | 0.36111     |
| 7  | T1D1P7              |                  |                           |                             | 0.674                               | 1           | 0.52778     |
| 8  | T1D1P8              |                  |                           |                             | 0.539                               | 0.98901     | 0.27778     |
| 9  | T1D1P9              |                  |                           |                             | 0.546                               | 1           | 0.22222     |
| 10 | T1D1P10             |                  |                           |                             | 0.505                               | 0.98901     | 0.36111     |
| 11 | T1D3P1              | 6                | 3                         | 5                           | 0.805                               | 1           | 0.44444     |
| 12 | T1D3P2              |                  |                           |                             | 0.842                               | 1           | 0.47222     |
| 13 | T1D3P3              |                  |                           |                             | 0.544                               | 1           | 0.30556     |
| 14 | T1D3P4              |                  |                           |                             | 0.629                               | 1           | 0.25        |
| 15 | T1D3P5              |                  |                           |                             | 0.746                               | 1           | 0.33333     |
| 16 | T1D3P6*             |                  |                           |                             | 0.909                               | 1           | 0.30556     |
| 17 | T1D3P7              |                  |                           |                             | 0.637                               | 1           | 0.33333     |
| 18 | T1D3P8*             |                  |                           |                             | 0.901                               | 1           | 0.27778     |
| 19 | T1D3P9              |                  |                           |                             | 0.814                               | 1           | 0.38889     |
| 20 | T1D3P10             |                  |                           |                             | 0.867                               | 1           | 0.27778     |
| 21 | T2D3P1              | 7                | 3                         | 5                           | 0.805                               | 1           | 0.44444     |
| 22 | T2D3P2              |                  |                           |                             | 0.842                               | 1           | 0.47222     |
| 23 | T2D3P3              |                  |                           |                             | 0.544                               | 1           | 0.30556     |
| 24 | T2D3P4              |                  |                           |                             | 0.629                               | 1           | 0.25        |
| 25 | T2D3P5              |                  |                           |                             | 0.746                               | 1           | 0.33333     |
| 26 | T2D3P6*             |                  |                           |                             | 0.909                               | 1           | 0.30556     |
| 27 | T2D3P7              |                  |                           |                             | 0.637                               | 1           | 0.33333     |
| 28 | T2D3P8*             |                  |                           |                             | 0.901                               | 1           | 0.27778     |
| 29 | T2D3P9              |                  |                           |                             | 0.814                               | 1           | 0.38889     |
| 30 | T2D3P10             |                  |                           |                             | 0.867                               | 1           | 0.27778     |
| 31 | T2D1P1              | 7                | 1                         | 5                           | 0.657                               | 0.98901     | 0.5         |
| 32 | T2D1P2              |                  |                           |                             | 0.831                               | 1           | 0.61111     |
| 33 | T2D1P3              |                  |                           |                             | 0.851                               | 1           | 0.63889     |
| 34 | T2D1P4              |                  |                           |                             | 0.837                               | 1           | 0.58333     |
| 35 | T2D1P5              |                  |                           |                             | 0.63                                | 0.97802     | 0.52778     |
| 36 | T2D1P6              |                  |                           |                             | 0.705                               | 0.97802     | 0.52778     |
| 37 | T2D1P7              |                  |                           |                             | 0.774                               | 0.98901     | 0.47222     |
| 38 | T2D1P8              |                  |                           |                             | 0.801                               | 0.96703     | 0.63889     |
| 39 | T2D1P9              |                  |                           |                             | 0.831                               | 1           | 0.63889     |
| 40 | T2D1P10             |                  |                           |                             | 0.539                               | 0.98901     | 0.27778     |

|    |         |    |   |   |       |         |         |
|----|---------|----|---|---|-------|---------|---------|
| 41 | T3D1P1  | 10 | 1 | 5 | 0.803 | 0.96703 | 0.66667 |
| 42 | T3D1P2  |    |   |   | 0.657 | 0.98901 | 0.5     |
| 43 | T3D1P3  |    |   |   | 0.831 | 1       | 0.61111 |
| 44 | T3D1P4  |    |   |   | 0.851 | 1       | 0.63889 |
| 45 | T3D1P5  |    |   |   | 0.837 | 1       | 0.58333 |
| 46 | T3D1P6  |    |   |   | 0.63  | 0.97802 | 0.52778 |
| 47 | T3D1P7  |    |   |   | 0.705 | 0.97802 | 0.52778 |
| 48 | T3D1P8  |    |   |   | 0.774 | 0.98901 | 0.47222 |
| 49 | T3D1P9  |    |   |   | 0.801 | 0.96703 | 0.63889 |
| 50 | T3D1P10 |    |   |   | 0.831 | 1       | 0.63889 |
| 51 | T3D3P1  | 10 | 3 | 5 | 0.805 | 1       | 0.44444 |
| 52 | T3D3P2  |    |   |   | 0.842 | 1       | 0.47222 |
| 53 | T3D3P3  |    |   |   | 0.544 | 1       | 0.30556 |
| 54 | T3D3P4  |    |   |   | 0.629 | 1       | 0.25    |
| 55 | T3D3P5  |    |   |   | 0.746 | 1       | 0.33333 |
| 56 | T3D3P6* |    |   |   | 0.909 | 1       | 0.30556 |
| 57 | T3D3P7  |    |   |   | 0.637 | 1       | 0.33333 |
| 58 | T3D3P8* |    |   |   | 0.901 | 1       | 0.27778 |
| 59 | T3D3P9  |    |   |   | 0.814 | 1       | 0.38889 |
| 60 | T3D3P10 |    |   |   | 0.867 | 1       | 0.27778 |
| 61 | T4D1P1  | 10 | 1 | 4 | 0.838 | 0.97802 | 0.63889 |
| 62 | T4D1P2  |    |   |   | 0.705 | 0.98901 | 0.47222 |
| 63 | T4D1P3  |    |   |   | 0.82  | 1       | 0.58333 |
| 64 | T4D1P4* |    |   |   | 0.928 | 1       | 0.55556 |
| 65 | T4D1P5* |    |   |   | 0.921 | 1       | 0.55556 |
| 66 | T4D1P6  |    |   |   | 0.652 | 0.98901 | 0.52778 |
| 67 | T4D1P7  |    |   |   | 0.778 | 0.98901 | 0.47222 |
| 68 | T4D1P8  |    |   |   | 0.858 | 1       | 0.44444 |
| 69 | T4D1P9  |    |   |   | 0.818 | 0.97802 | 0.58333 |
| 70 | T4D1P10 |    |   |   | 0.871 | 1       | 0.61111 |
| 71 | T4D3P1  | 10 | 3 | 4 | 0.852 | 1       | 0.41667 |
| 72 | T4D3P2  |    |   |   | 0.856 | 1       | 0.44444 |
| 73 | T4D3P3  |    |   |   | 0.568 | 1       | 0.30556 |
| 74 | T4D3P4  |    |   |   | 0.755 | 1       | 0.25    |
| 75 | T4D3P5  |    |   |   | 0.832 | 1       | 0.33333 |
| 76 | T4D3P6* |    |   |   | 0.915 | 1       | 0.27778 |
| 77 | T4D3P7  |    |   |   | 0.723 | 1       | 0.33333 |
| 78 | T4D3P8  |    |   |   | 0.887 | 1       | 0.27778 |
| 79 | T4D3P9* |    |   |   | 0.916 | 1       | 0.36111 |
| 80 | T4D3P10 |    |   |   | 0.891 | 1       | 0.27778 |

<sup>a</sup> Minimum interference distance.

<sup>b</sup> Maximum exclusion volume distance.

<sup>c</sup> Receiver operating characteristic curve.

<sup>d</sup> Area under the curve.

\* Selected pharmacophore models for ligand mapping.

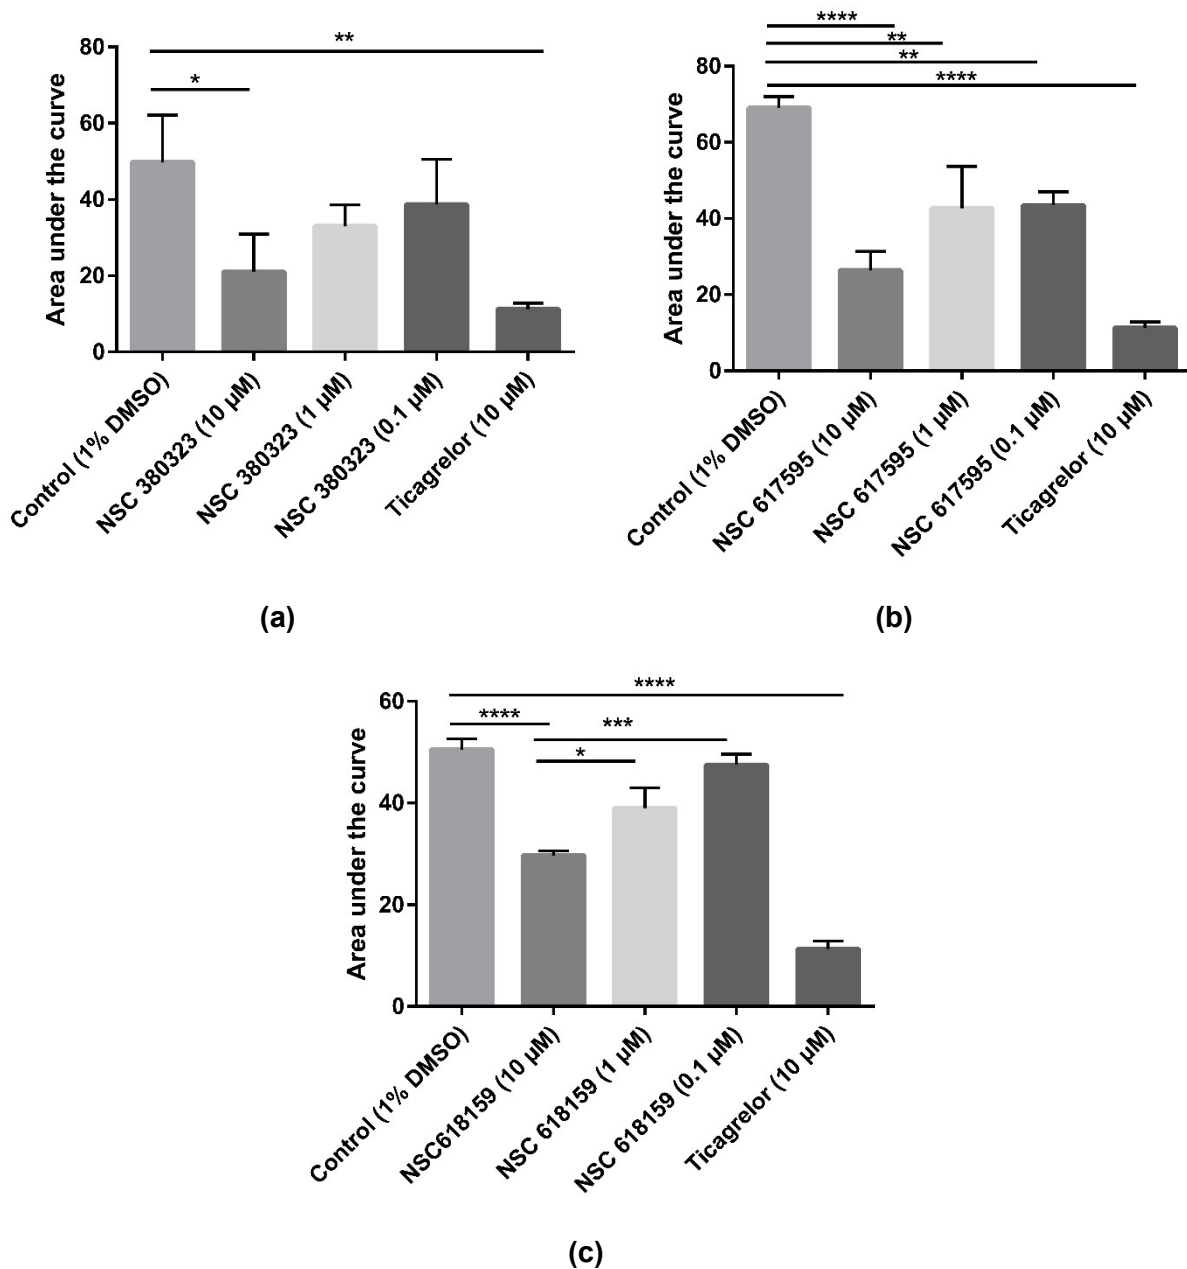

**Fig. S1.** Histograms representing the Area under the curve from the platelet aggregation test for **(a)** NSC380323, **(b)** NSC617595 and **(c)** NSC618159 with ADP.

\*  $p \leq 0.05$ ; \*\*  $p \leq 0.01$ ; \*\*\*  $p \leq 0.001$ ; \*\*\*\*  $p \leq 0.0001$
